# Supplementary material for: Impact of insulin on primary arcuate neurons culture is dependent on early-postnatal nutritional status and neuronal subpopulation
Source: PubMed Central journal article supplement (PMC5821369; doi:10.1371/journal.pone.0193196), 2018-02-21
Supplement: pone.0193196.s002.pdf [file pone.0193196.s002.pdf]

**A**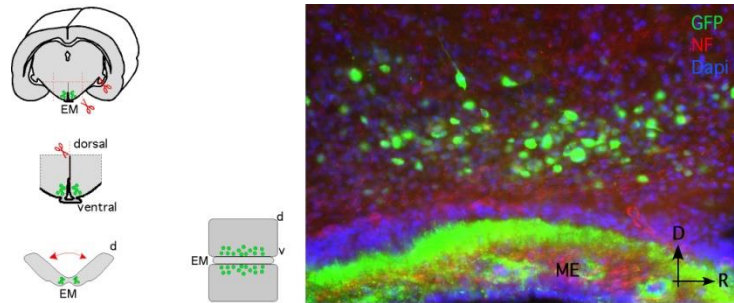**B**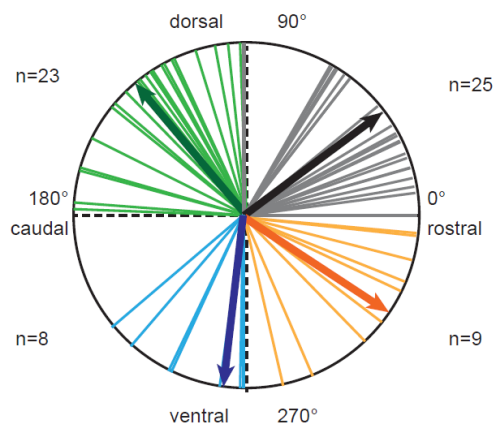**S1 FIGURE**
